# Supplementary material
Source: ML conference proceedings conference paper supplement (https://openaccess.thecvf.com/content/WACV2024/html/Ju_Improving_Fairness_in_WACV_2024_paper.html)
Supplement: Supplementary file 1 [file Ju_Improving_Fairness_in_WACV_2024_supplemental.pdf]

## Appendix for “Improving Fairness in Deepfake Detection”

This Appendix provides proof of the proposed methods, additional experimental details and results. Specifically, Sections A, B, and C provide proof and details of the proposed methods. Section D provides details of our experiment, including parameter setting and source code. Section E provides further analysis of additional experimental results, including optimization by different metric (in E.1), effect of choosing different hyperparameters (in E.2), performance on Cross-domain Dataset (in E.3), convergence analysis of the proposed methods (in E.4), more comparison results (in E.5 and E.6), and details on datasets and results of each subgroup (in E.7 and E.8).

### A. Proofs

#### A.1. Proof of Proposition 1

*Proof.* For any  $m$ , denote  $Z = (X, Y)$  and  $\mathcal{D}_m$  as a set that contains samples from  $m$ -th group, then  $\mathbb{P}(Z) = \pi_m \mathbb{P}(Z|\mathcal{D}_m) + (1 - \pi_m) \mathbb{P}(Z|\overline{\mathcal{D}_m})$ , where  $\overline{\mathcal{D}_m}$  contains samples are not in  $\mathcal{D}_m$ . Let  $\mathbb{Q}(Z) = \mathbb{P}(Z|\mathcal{D}_m)$  and  $\mathbb{Q}'(Z) = \frac{\pi_m - \alpha}{1 - \alpha} \mathbb{P}(Z|\mathcal{D}_m) + \frac{1 - \pi_m}{1 - \alpha} \mathbb{P}(Z|\overline{\mathcal{D}_m})$ . Then  $\mathbb{P}(Z) = \alpha \mathbb{Q}(Z) + (1 - \alpha) \mathbb{Q}'(Z)$ , which implies that

$$\alpha \mathbb{E}_{\mathbb{Q}(Z)}[\ell(\theta; Z) - \lambda] = \mathbb{E}_{\alpha \mathbb{Q}(Z)}[\ell(\theta; Z) - \lambda] \leq \mathbb{E}_{\alpha \mathbb{Q}(Z)}[[\ell(\theta; Z) - \lambda]_+] \leq \mathbb{E}_{\mathbb{P}(Z)}[[\ell(\theta; Z) - \lambda]_+].$$

The last inequality holds because  $\alpha \leq \min_{m=1, \dots, K} \pi_m$  and  $\alpha \in (0, 1)$ , which means  $\mathbb{Q}'(Z) \geq 0$  and therefore  $\mathbb{P}(Z) \geq \alpha \mathbb{Q}(Z)$ . From the above inequations, we obtain

$$\begin{aligned} \alpha \mathbb{E}_{\mathbb{Q}(Z)}[\ell(\theta; Z) - \lambda] &\leq \mathbb{E}_{\mathbb{P}(Z)}[[\ell(\theta; Z) - \lambda]_+] \\ \Rightarrow \mathbb{E}_{\mathbb{Q}(Z)}[\ell(\theta; Z) - \lambda] &\leq \frac{1}{\alpha} \mathbb{E}_{\mathbb{P}(Z)}[[\ell(\theta; Z) - \lambda]_+] \\ \Rightarrow \mathbb{E}_{\mathbb{Q}(Z)}[\ell(\theta; Z)] &\leq \lambda + \frac{1}{\alpha} \mathbb{E}_{\mathbb{P}(Z)}[[\ell(\theta; Z) - \lambda]_+] = \text{CVaR}_\alpha(\theta) \end{aligned}$$

In Section 3.1, we have already defined  $\mathbb{P}_m$ , which is just  $\mathbb{Q}(Z)$ . Therefore, we have  $\mathcal{R}_{\max}(\theta) \leq \text{CVaR}_\alpha(\theta)$ . □

#### A.2. Proof of Theorem 1

*Proof.* 1) We first prove that  $\frac{1}{k} \sum_{i=1}^k \ell_{[i]} = \min_{\lambda \in \mathbb{R}} \lambda + \frac{1}{k} \sum_{i=1}^q [l_i - \lambda]_+$ .

$\Rightarrow$ : Suppose  $\bar{\ell} := \{\ell_1, \dots, \ell_q\}$ . We know  $\sum_{i=1}^k \ell_{[i]}$  is the solution of

$$\max_{\mathbf{p}} \mathbf{p}^\top \bar{\ell}, \text{ s.t. } \mathbf{p}^\top \mathbf{1} = k, \mathbf{0} \leq \mathbf{p} \leq \mathbf{1}.$$

We apply Lagrangian to this equation and get

$$\mathcal{L} = -\mathbf{p}^\top \bar{\ell} - \mathbf{v}^\top \mathbf{p} + \mathbf{u}^\top (\mathbf{p} - \mathbf{1}) + \lambda (\mathbf{p}^\top \mathbf{1} - k)$$

where  $\mathbf{u} \geq \mathbf{0}$ ,  $\mathbf{v} \geq \mathbf{0}$  and  $\lambda \in \mathbb{R}$  are Lagrangian multipliers. Taking its derivative with respect to  $\mathbf{p}$  and set it to 0, we have  $\mathbf{v} = \mathbf{u} - \bar{\ell} + \lambda \mathbf{1}$ . Substituting it back into the Lagrangian, we get

$$\min_{\mathbf{u}, \lambda} \mathbf{u}^\top \mathbf{1} + k\lambda, \text{ s.t. } \mathbf{u} \geq \mathbf{0}, \mathbf{u} + \lambda \mathbf{1} - \bar{\ell} \geq \mathbf{0}.$$

This means

$$\sum_{i=1}^k \ell_{[i]} = \min_{\lambda} k\lambda + \sum_{i=1}^q [l_i - \lambda]_+.$$

Therefore,

$$\frac{1}{k} \sum_{i=1}^k \ell_{[i]} = \min_{\lambda} \lambda + \frac{1}{k} \sum_{i=1}^q [l_i - \lambda]_+. \quad (\text{A.1})$$

$\Leftarrow$ : Denote  $\bar{\mathcal{L}} := \lambda + \frac{1}{k} \sum_{i=1}^q [l_i - \lambda]_+$ . Since  $\bar{\mathcal{L}}$  is a convex function with respect to  $\lambda$ , we can set the  $\partial_\lambda \bar{\mathcal{L}} = 0$  to get the optimal value of  $\lambda^*$ . Thus, we have  $\partial_\lambda \bar{\mathcal{L}} = 1 - \frac{1}{k} \sum_{i=1}^q \mathbb{1}_{[l_i \geq \lambda^*]} = 0$ , then  $\lambda^* = \ell_{[k]}$  can be an optimal value. Taking  $\lambda^* = \ell_{[k]}$  into  $\bar{\mathcal{L}}$ , we obtain  $\bar{\mathcal{L}} = \frac{1}{k} \sum_{i=1}^k \ell_{[i]}$ .

Based on the above analysis, we get  $\frac{1}{k} \sum_{i=1}^k \ell_{[i]} = \min_{\lambda \in \mathbb{R}} \{\lambda + \frac{1}{k} \sum_{i=1}^q [l_i - \lambda]_+\}$ .

2) Using the above result, we can directly replace  $\mathcal{L}_g(\theta) = \frac{1}{k_g} \sum_{j=1}^{k_g} \ell_{[j]}^g(\theta)$  from (8) with  $\mathcal{L}_g(\theta) = \min_{\lambda_g \in \mathbb{R}} \{\lambda_g + \frac{1}{\alpha_g n_g} \sum_{i \in \mathcal{I}_g} [\ell(\theta; X_i, Y_i) - \lambda_g]_+\}$ . This is also shown in (9). □

## B. Pseudocode of the DAW-FDD

---

### Algorithm 2: DAW-FDD

---

**Input:** A training dataset  $\mathcal{S}$  with demographic variable  $G$ , A set of subgroups  $\mathcal{G}$ ,  $\alpha$ ,  $\alpha_g$ , max.iterations, num\_batch,  $\eta$   
**Output:** A fair deepfake detection model with parameters  $\theta^*$

- 1 **Initialization:**  $\theta_0, l = 0$
- 2 **for**  $e = 1$  **to** max.iterations **do**
- 3     **for**  $b = 1$  **to** num\_batch **do**
- 4         Sample a mini-batch  $\mathcal{S}_b$  from  $\mathcal{S}$
- 5         Compute  $\ell(\theta_l; X_i, Y_i), \forall (X_i, Y_i) \in \mathcal{S}_b$
- 6         For each  $g \in \{1, \dots, |\mathcal{G}|\}$ , set  $\lambda_g^*$  to be the value of  $\lambda_g$  that minimizes  $\mathcal{L}_g(\theta, \lambda_g)$  as given in (9b). This minimization is solved using binary search.
- 7         Set  $L_g(\theta) \leftarrow L_g(\theta, \lambda_g^*)$  using (9b),  $\forall g$
- 8         Using binary search to find  $\lambda$  that minimizes (9a)
- 9         Set  $\theta_{l+1} \leftarrow \theta_l - \eta \partial_\theta \mathcal{L}_{\text{DAW-FDD}}(\theta_l, \lambda)$
- 10          $l \leftarrow l + 1$
- 11     **end**
- 12 **end**
- 13 **return**  $\theta^* \leftarrow \theta_l$

---

## C. Explicit Forms of (sub) gradients

From equation (9), we have

$$\begin{aligned} \min_{\theta \in \Theta, \lambda \in \mathbb{R}} \mathcal{L}_{\text{DAW-FDD}}(\theta, \lambda) &:= \lambda + \frac{1}{\alpha |\mathcal{G}|} \sum_{g \in \mathcal{G}} [\mathcal{L}_g(\theta) - \lambda]_+, \\ \text{s.t. } \mathcal{L}_g(\theta) &= \min_{\lambda_g \in \mathbb{R}} \mathcal{L}_g(\theta, \lambda_g) := \lambda_g + \frac{1}{\alpha_g n_g} \sum_{i \in \mathcal{I}_g} [\ell(\theta; X_i, Y_i) - \lambda_g]_+. \end{aligned}$$

We can get

$$\partial_\theta \mathcal{L}_{\text{DAW-FDD}}(\theta, \lambda) = \frac{1}{\alpha |\mathcal{G}|} \sum_{g \in \mathcal{G}} \left[ \left( \frac{1}{\alpha_g n_g} \sum_{i \in \mathcal{I}_g} \partial_\theta \ell(\theta; X_i, Y_i) \cdot \mathbb{1}_{[\ell(\theta; X_i, Y_i) > \lambda_i]} \right) \cdot \mathbb{1}_{[\mathcal{L}_g(\theta) > \lambda]} \right]$$

## D. Additional Experimental Details

### D.1. $\alpha$ and $\alpha_g$ Settings on Each Dataset

We tune  $\alpha$  and  $\alpha_g$  on the following hyperparameter grid: 0.1, 0.3, 0.5, 0.7, 0.9. We provide a reference for setting  $\alpha$  and  $\alpha_g$  to reproduce our experimental results in Table D.1.

| Parameter                     | Xception |          |          |          | ResNet-50 | EfficientNet-B3 | DSP-FWA  | RECCE    |
|-------------------------------|----------|----------|----------|----------|-----------|-----------------|----------|----------|
|                               | FF++     | Celeb-DF | DFD      | DFDC     | FF++      | FF++            | FF++     | FF++     |
| $\alpha$ in DAG-FDD           | 0.5      | 0.5      | 0.3      | 0.7      | 0.5       | 0.5             | 0.5      | 0.5      |
| $\alpha, \alpha_g$ in DAW-FDD | 0.5, 0.9 | 0.5, 0.7 | 0.7, 0.9 | 0.5, 0.7 | 0.5, 0.9  | 0.5, 0.9        | 0.7, 0.9 | 0.5, 0.9 |

Table D.1. Hyperparameter settings of DAG-FDD and DAW-FDD.

### D.2. Trade-off Parameters for *Cons.* EFPR and *Cons.* EO

For *Cons.* EFPR and *Cons.* EO baselines, we tune the trade-off hyperparameters on the following grid: 0.5, 0.6, 0.7, 0.8, 0.9. Finally, we use 0.6 for both methods since this hyperparameter can return the best performance.

## E. Additional Experimental Results

### E.1. Optimization by Metric $F_{EO}$

We employ  $F_{EO}$  as an index to tune the hyperparameter and report the results in Table E.1. The results illustrate that optimizing hyperparameters using  $F_{EO}$  can improve TPR and  $F_{EO}$  (compared with results in Table 4), which demonstrates that our method can generalize to different metric.

| Methods        | Fairness Metrics (%) ↓ |             |             |              | Detection Metrics (%) |             |              |              |
|----------------|------------------------|-------------|-------------|--------------|-----------------------|-------------|--------------|--------------|
|                | Intersection           |             |             |              | Overall               |             |              |              |
|                | $G_{AUC}$              | $G_{FPR}$   | $F_{FPR}$   | $F_{EO}$     | AUC ↑                 | FPR ↓       | TPR ↑        | ACC ↑        |
| Original       | 8.53                   | 11.81       | 15.66       | 39.95        | 97.17                 | 13.01       | <b>95.83</b> | <b>94.05</b> |
| DAG-FDD (Ours) | <b>5.86</b>            | 7.04        | 8.23        | <b>29.65</b> | 98.50                 | 5.06        | 93.48        | 93.78        |
| DAW-FDD (Ours) | 6.67                   | <b>2.96</b> | <b>3.96</b> | 30.52        | <b>98.81</b>          | <b>2.78</b> | 91.99        | 93.04        |

Table E.1. Test set results of Xception on the Celeb-DF dataset, optimized by  $F_{EO}$  metric.

### E.2. Effect of $\alpha$ and $\alpha_g$

Fig. E.1 shows the fairness metrics and performance metric AUC to different  $\alpha$  and  $\alpha_g$  values in DAG-FDD and DAW-FDD methods, respectively, when using Xception as backbone in FF++ dataset. Experiment result in Fig. E.1 (a) demonstrates that the model achieves the best fairness performance when setting  $\alpha$  as 0.5 in DAG-FDD and also keeps fair AUC score. In FAW-FDD, we set  $\alpha$  as 0.5 selected from the range of  $\{0.1, 0.3, 0.5, 0.7, 0.9\}$  based on the best fairness performance first. Secondly, we searched for the optimal value of  $\alpha_g$  in the range of  $\{0.1, 0.3, 0.5, 0.7, 0.9\}$  while keeping  $\alpha$  fixed at its optimal value. Fig. E.1 (b) shows that the proposed DAW-FDD performs best when  $\alpha_g$  is set to 0.9 when  $\alpha$  is fixed on 0.5.

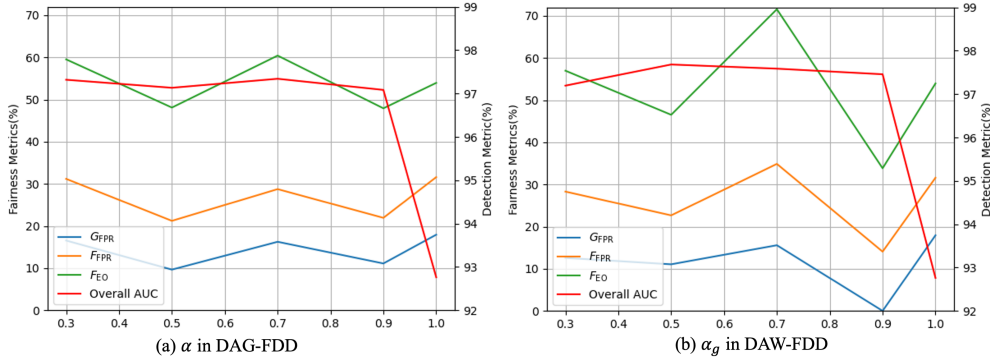

Figure E.1. Parameters of DAG-FDD and DAW-FDD on FF++ dataset with Xception.

### E.3. Performance on Cross-domain Dataset

We further evaluate the performance of our methods using Xception on cross-domain dataset. The models are trained on FF++ dataset and tested on DFDC dataset. The results are presented in Table E.2.

| Methods        | Fairness Metrics (%) ↓ |           |           |          | Detection Metrics (%) |       |       |       |
|----------------|------------------------|-----------|-----------|----------|-----------------------|-------|-------|-------|
|                | Intersection           |           |           |          | Overall               |       |       |       |
|                | $G_{AUC}$              | $G_{FPR}$ | $F_{FPR}$ | $F_{EO}$ | AUC ↑                 | FPR ↓ | TPR ↑ | ACC ↑ |
| Original       | 33.76                  | 17.19     | 30.70     | 122.51   | 58.81                 | 59.54 | 71.60 | 51.57 |
| DAG-FDD (Ours) | 25.42                  | 24.16     | 49.27     | 117.19   | 56.32                 | 35.29 | 47.06 | 58.41 |
| DAW-FDD (Ours) | 26.96                  | 21.50     | 45.34     | 119.32   | 59.95                 | 43.70 | 60.69 | 57.87 |

Table E.2. Cross-domain Performance. Models are trained on FF++ and tested on DFDC.

### E.4. Convergence of the Proposed Loss Functions

We also show the training loss convergence of our methods when applying to Xception on FF++ dataset in Fig. E.2. The results show that our methods can converge within reasonable epochs.

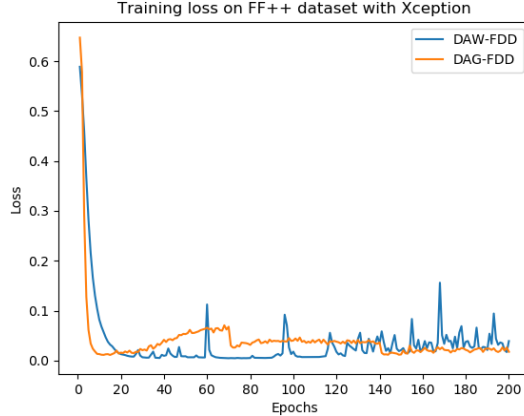

Figure E.2. Training loss convergence.

| Methods           | Require Demographics | Fairness Metrics (%) ↓ |             |             |              |              |              |              |              |              | Detection Metrics (%) |              |              |              |
|-------------------|----------------------|------------------------|-------------|-------------|--------------|--------------|--------------|--------------|--------------|--------------|-----------------------|--------------|--------------|--------------|
|                   |                      | Gender                 |             |             | Race         |              |              | Intersection |              |              | Overall               |              |              |              |
|                   |                      | $G_{FPR}$              | $F_{FPR}$   | $F_{EO}$    | $G_{FPR}$    | $F_{FPR}$    | $F_{EO}$     | $G_{FPR}$    | $F_{FPR}$    | $F_{EO}$     | AUC ↑                 | FPR ↓        | TPR ↑        | ACC ↑        |
| Original          | —                    | 0.87                   | 0.87        | <b>3.14</b> | 18.81        | 27.65        | 30.07        | 30.26        | 67.38        | 80.34        | 98.05                 | 21.20        | <b>98.21</b> | 94.74        |
| DRO $\chi^2$ [30] | ×                    | 1.46                   | 1.46        | 4.17        | 13.87        | 20.05        | 23.15        | 23.63        | 42.14        | 57.29        | 98.32                 | 15.65        | 97.28        | 94.97        |
| DAG-FDD (Ours)    |                      | <b>0.55</b>            | <b>0.55</b> | 3.71        | <b>12.68</b> | <b>17.41</b> | <b>20.33</b> | <b>15.40</b> | <b>36.17</b> | <b>54.24</b> | <b>98.33</b>          | <b>12.01</b> | <b>96.80</b> | <b>95.23</b> |
| Naive [16]        | ✓                    | 9.48                   | 9.48        | 13.05       | 18.26        | 20.86        | 22.27        | 28.74        | 73.59        | 89.87        | 93.64                 | 27.57        | 95.96        | 91.76        |
| FRM [22]          |                      | 2.15                   | 2.15        | 5.48        | 8.50         | 10.00        | 13.75        | 14.88        | 30.59        | <b>49.86</b> | 98.06                 | 15.21        | 97.05        | 94.86        |
| Group DRO [59]    |                      | 0.74                   | 0.74        | 3.71        | 12.08        | 16.26        | 20.01        | 15.17        | 32.95        | 51.08        | 98.22                 | 11.75        | 96.59        | 95.10        |
| Cons. EFPR [60]   |                      | 6.13                   | 6.13        | 11.15       | 10.71        | 15.00        | 19.46        | 13.67        | 38.48        | 63.80        | 97.17                 | 14.72        | 96.29        | 94.32        |
| DAW-FDD (Ours)    |                      | <b>0.25</b>            | <b>0.25</b> | 4.75        | <b>6.99</b>  | <b>7.96</b>  | <b>11.95</b> | <b>13.54</b> | <b>23.44</b> | 52.95        | <b>98.35</b>          | <b>8.15</b>  | 94.59        | 94.10        |

Table E.3. Comparison results with different fairness solutions using RECCE Deepfake detector on FF++ testing set across Gender, Race, and Intersection groups. The best results are shown in **Bold**. ↑ means higher is better and ↓ means lower is better. Gray highlights mean our methods outperform the baselines in the group (i.e., DAG-FDD vs. Original/DRO $\chi^2$ , DAW-FDD vs. Original/Naive/FRM/Group DRO/Cons. EFPR).

## E.5. Comparison on SOTA Deepfake Detector

Since the RECCE model achieves SOTA detection performance on several datasets, we apply our methods and baselines based on the RECCE detector and show the results in Table E.3. The results demonstrate the adaptability and efficiency of our methods.

## E.6. Results on DF-Platter Dataset

We apply our methods and baseline to the Xception network on a recent Deepfake dataset with demographic annotations, namely DF-Platter, to further illustrate the effectiveness of our methods. We mainly consider Gender (Male and Female) and Age (Young Adult, Adult, Old) attributes based on the official annotations. In addition to the single attribute fairness, we also consider the combined attributes (Intersection) group, including Male-Young Adult (M-Y), Male-Adult (M-A), Male-Old (M-O), Female-Young Adult (F-Y), Female-Adult (F-A), and Female-Old (F-O). We train and evaluate our methods on a subset of the DF-Platter dataset consisting of real and FSGAN-generated data from Set A with C23 compression, and use Dlib [61] for face extraction and alignment. The cropped faces are resized to  $380 \times 380$  for training and testing. Training/validation/test datasets are divided following the official split, without identity overlapping. Experiment results shown in Table E.4 demonstrate that our methods outperform baseline for most metrics.

## E.7. Dataset Details

We show the total number of train/val/test samples of each dataset and the attributes included in our experiment in Table E.5. Specifically, the number of training samples within each subgroup for four datasets is shown in Table E.6.

| Methods        | Fairness Metrics (%) ↓ |             |             |             |             |             |              |             |             | Detection Metrics (%) |             |              |              |
|----------------|------------------------|-------------|-------------|-------------|-------------|-------------|--------------|-------------|-------------|-----------------------|-------------|--------------|--------------|
|                | Gender                 |             |             | Age         |             |             | Intersection |             |             | Overall               |             |              |              |
|                | $G_{FPR}$              | $F_{FPR}$   | $F_{EO}$    | $G_{FPR}$   | $F_{FPR}$   | $F_{EO}$    | $G_{FPR}$    | $F_{FPR}$   | $F_{EO}$    | AUC ↑                 | FPR ↓       | TPR ↑        | ACC ↑        |
| Original       | 3.70                   | 3.70        | 3.92        | 3.43        | 3.90        | 5.03        | 4.96         | 11.94       | 14.56       | 99.93                 | 2.80        | 99.82        | 98.54        |
| DAG-FDD (Ours) | 3.05                   | 3.05        | 3.18        | 3.40        | 3.29        | 4.06        | 4.72         | 10.35       | 12.03       | <b>99.97</b>          | 2.42        | <b>99.91</b> | 98.77        |
| DAW-FDD (Ours) | <b>1.95</b>            | <b>1.95</b> | <b>2.13</b> | <b>1.97</b> | <b>2.17</b> | <b>2.96</b> | <b>3.27</b>  | <b>6.81</b> | <b>8.81</b> | <b>99.97</b>          | <b>1.75</b> | 99.82        | <b>99.05</b> |

Table E.4. Comparison results with different fairness solutions using the Xception detector on DF-Platter testing set across Gender, Age, and Intersection groups. The best results are shown in **Bold**. ↑ means higher is better and ↓ means lower is better. Gray highlights mean our methods outperform the Original baseline.

| Dataset  | # Samples | Sensitive Attributes                                      |
|----------|-----------|-----------------------------------------------------------|
| FF++     | 126,956   | Gender (Male, Female), Race (White, Black, Asian, Others) |
| Celeb-DF | 143,273   | Gender (Male, Female), Race (White, Black, Others)        |
| DFD      | 40,246    | Gender (Male, Female), Race (White, Black, Others)        |
| DFDC     | 117,065   | Gender (Male, Female), Race (White, Black, Asian, Others) |

Table E.5. Sample number and attributes in each dataset.

| Datasets | Gender |       | Race  |       |       |      | Intersection |      |       |      |      |      |       |      |
|----------|--------|-------|-------|-------|-------|------|--------------|------|-------|------|------|------|-------|------|
|          | M      | F     | A     | B     | W     | O    | M-A          | M-B  | M-W   | M-O  | F-A  | F-B  | F-W   | F-O  |
| FF++     | 33549  | 42590 | 10488 | 2579  | 56724 | 6348 | 2475         | 1468 | 31281 | 4163 | 8013 | 1111 | 31281 | 2185 |
| Celeb-DF | 87344  | 6251  | -     | 630   | 86583 | 6382 | -            | 600  | 81194 | 5550 | -    | 30   | 5389  | 832  |
| DFD      | 16607  | 7227  | -     | 8121  | 11911 | 3802 | -            | 6482 | 7784  | 2341 | -    | 1639 | 4127  | 1461 |
| DFDC     | 37911  | 33567 | 4059  | 18909 | 40257 | 8253 | 2144         | 9603 | 21755 | 4409 | 1915 | 9306 | 18502 | 3844 |

Table E.6. Number of training samples of each group in the FF++, Celeb-DF, DFD and DFDC datasets. “-” means group does not exist in the dataset.

## E.8. Detailed Results

Detailed test results of each subgroup on four datasets based on four models are presented in this section. Table E.7 provides comprehensive metrics of each subgroup on the four datasets, while Table E.8 displays details of the four models. These findings align with the results reported in Tables 2, 4, 5 and Figures 1, 2 of the submitted manuscript.

| Datasets | Methods        | Metric (%) | Gender |       | Race  |       |       |       | Intersection |       |       |       |       |       |       |       |
|----------|----------------|------------|--------|-------|-------|-------|-------|-------|--------------|-------|-------|-------|-------|-------|-------|-------|
|          |                |            | M      | F     | A     | B     | W     | O     | M-A          | M-B   | M-W   | M-O   | F-A   | F-B   | F-W   | F-O   |
| FF++     | Original       | AUC        | 92.42  | 93.30 | 89.33 | 94.44 | 92.93 | 97.01 | 88.09        | 95.21 | 92.47 | 95.43 | 90.33 | 93.42 | 93.53 | 99.40 |
|          |                | FPR        | 19.86  | 23.95 | 32.67 | 24.29 | 20.10 | 19.58 | 25.63        | 21.74 | 19.01 | 18.79 | 36.72 | 26.27 | 21.08 | 20.53 |
|          |                | TPR        | 91.84  | 96.80 | 94.92 | 95.66 | 94.09 | 96.07 | 89.13        | 95.69 | 91.70 | 93.43 | 97.96 | 95.63 | 96.35 | 99.86 |
|          |                | ACC        | 89.80  | 93.01 | 89.55 | 92.17 | 91.57 | 93.49 | 86.12        | 93.02 | 89.83 | 91.55 | 91.38 | 91.30 | 93.20 | 96.20 |
|          | DAG-FDD (Ours) | AUC        | 96.59  | 97.65 | 96.74 | 96.76 | 97.08 | 98.76 | 93.20        | 99.44 | 96.55 | 98.34 | 98.24 | 94.19 | 97.60 | 99.31 |
|          |                | FPR        | 8.67   | 10.30 | 13.65 | 8.57  | 9.21  | 5.42  | 14.29        | 9.78  | 8.06  | 6.08  | 13.29 | 7.63  | 10.26 | 4.64  |
|          |                | TPR        | 91.93  | 96.51 | 94.62 | 95.25 | 94.28 | 93.63 | 88.16        | 98.43 | 92.06 | 91.11 | 98.02 | 91.88 | 96.39 | 97.25 |
|          |                | ACC        | 91.82  | 95.26 | 93.01 | 94.58 | 93.66 | 93.79 | 87.66        | 97.18 | 92.04 | 91.55 | 95.86 | 91.97 | 95.19 | 96.91 |
|          | DAW-FDD (Ours) | AUC        | 96.91  | 98.05 | 96.39 | 97.92 | 97.54 | 98.23 | 94.63        | 97.81 | 97.07 | 97.24 | 97.35 | 98.23 | 98.11 | 99.22 |
|          |                | FPR        | 11.29  | 11.61 | 12.58 | 13.33 | 11.18 | 10.84 | 9.24         | 15.22 | 11.20 | 12.71 | 14.49 | 11.86 | 11.17 | 8.61  |
|          |                | TPR        | 93.48  | 97.15 | 94.40 | 96.36 | 95.47 | 95.77 | 88.91        | 96.08 | 93.92 | 93.13 | 97.29 | 96.67 | 96.94 | 99.57 |
|          |                | ACC        | 92.65  | 95.55 | 93.04 | 94.67 | 94.29 | 94.68 | 89.29        | 94.35 | 93.02 | 92.23 | 95.05 | 94.98 | 95.48 | 98.10 |
| Celeb-DF | Original       | AUC        | 87.83  | 98.04 | -     | 91.47 | 97.40 | 99.91 | -            | 91.47 | -     | -     | -     | -     | 98.00 | 100   |
|          |                | FPR        | 16.47  | 11.55 | -     | 11.55 | 13.31 | 10.00 | -            | 11.55 | -     | -     | -     | -     | 11.81 | 0.00  |
|          |                | TPR        | 79.62  | 96.74 | -     | 79.62 | 96.74 | 100   | -            | 79.62 | -     | -     | -     | -     | 96.74 | 100   |
|          |                | ACC        | 81.90  | 95.44 | -     | 82.88 | 94.89 | 91.67 | -            | 82.88 | -     | -     | -     | -     | 95.42 | 100   |
|          | DAG-FDD (Ours) | AUC        | 91.61  | 98.53 | -     | 92.56 | 98.28 | 99.98 | -            | 92.56 | -     | -     | -     | -     | 98.51 | 100   |
|          |                | FPR        | 3.84   | 1.82  | -     | 2.54  | 2.43  | 1.33  | -            | 2.54  | -     | -     | -     | -     | 1.86  | 0.00  |
|          |                | TPR        | 73.43  | 88.18 | -     | 73.43 | 88.16 | 100   | -            | 73.43 | -     | -     | -     | -     | 88.16 | 100   |
|          |                | ACC        | 86.68  | 89.75 | -     | 82.31 | 89.90 | 98.89 | -            | 82.31 | -     | -     | -     | -     | 89.71 | 100   |
|          | DAW-FDD (Ours) | AUC        | 88.72  | 98.93 | -     | 91.52 | 98.38 | 100   | -            | 91.52 | -     | -     | -     | -     | 98.91 | 100   |
|          |                | FPR        | 4.78   | 0.97  | -     | 3.80  | 1.90  | 0.33  | -            | 3.80  | -     | -     | -     | -     | 0.99  | 0.00  |
|          |                | TPR        | 70.22  | 85.33 | -     | 70.22 | 85.31 | 100   | -            | 70.22 | -     | -     | -     | -     | 85.31 | 100   |
|          |                | ACC        | 84.79  | 87.49 | -     | 79.81 | 87.67 | 99.44 | -            | 79.81 | -     | -     | -     | -     | 87.43 | 100   |
| DFD      | Original       | AUC        | 92.41  | 93.34 | -     | 95.27 | 92.12 | -     | -            | 94.12 | 90.85 | -     | -     | 98.39 | 93.10 | -     |
|          |                | FPR        | 23.44  | 26.39 | -     | 19.48 | 26.83 | -     | -            | 19.65 | 26.78 | -     | -     | 18.18 | 26.86 | -     |
|          |                | TPR        | 94.57  | 97.14 | -     | 96.32 | 95.95 | -     | -            | 94.33 | 94.41 | -     | -     | 100   | 97.25 | -     |
|          |                | ACC        | 88.36  | 89.68 | -     | 88.37 | 88.48 | -     | -            | 86.22 | 88.86 | -     | -     | 95.48 | 88.20 | -     |
|          | DAG-FDD (Ours) | AUC        | 92.68  | 93.93 | -     | 94.93 | 92.89 | -     | -            | 93.64 | 92.26 | -     | -     | 98.51 | 93.58 | -     |
|          |                | FPR        | 26.53  | 29.44 | -     | 23.51 | 29.59 | -     | -            | 23.75 | 28.98 | -     | -     | 21.59 | 29.89 | -     |
|          |                | TPR        | 95.26  | 97.14 | -     | 97.11 | 96.13 | -     | -            | 95.75 | 94.96 | -     | -     | 99.62 | 97.13 | -     |
|          |                | ACC        | 87.75  | 88.72 | -     | 86.73 | 87.70 | -     | -            | 84.44 | 88.69 | -     | -     | 94.35 | 86.99 | -     |
|          | DAW-FDD (Ours) | AUC        | 92.38  | 93.77 | -     | 94.55 | 92.68 | -     | -            | 93.23 | 91.93 | -     | -     | 98.47 | 93.42 | -     |
|          |                | FPR        | 27.01  | 28.41 | -     | 25.97 | 28.34 | -     | -            | 26.54 | 27.43 | -     | -     | 21.59 | 28.79 | -     |
|          |                | TPR        | 94.97  | 96.71 | -     | 96.84 | 95.86 | -     | -            | 95.55 | 94.64 | -     | -     | 99.25 | 96.90 | -     |
|          |                | ACC        | 87.39  | 88.75 | -     | 85.36 | 87.93 | -     | -            | 82.74 | 88.86 | -     | -     | 94.07 | 87.26 | -     |
| DFDC     | Original       | AUC        | 91.19  | 93.41 | 79.27 | 94.69 | 92.24 | 89.33 | 66.96        | 92.61 | 92.67 | 86.82 | 99.77 | 95.50 | 91.54 | 94.58 |
|          |                | FPR        | 8.04   | 6.40  | 9.30  | 5.28  | 7.72  | 8.67  | 20.96        | 4.98  | 6.61  | 13.02 | 0.80  | 5.57  | 9.09  | 0.99  |
|          |                | TPR        | 74.69  | 77.41 | 56.68 | 81.36 | 76.45 | 68.15 | 44.44        | 71.80 | 77.80 | 67.57 | 93.33 | 85.14 | 75.45 | 68.61 |
|          |                | ACC        | 86.90  | 86.83 | 87.31 | 90.66 | 85.72 | 84.00 | 73.36        | 90.34 | 87.91 | 82.22 | 98.94 | 90.90 | 83.53 | 86.44 |
|          | DAG-FDD (Ours) | AUC        | 90.70  | 94.22 | 82.44 | 95.79 | 92.00 | 89.73 | 69.71        | 94.49 | 91.18 | 87.02 | 99.63 | 96.29 | 92.22 | 95.60 |
|          |                | FPR        | 7.22   | 5.91  | 6.81  | 3.87  | 7.60  | 8.47  | 15.28        | 3.49  | 6.54  | 12.54 | 0.64  | 4.24  | 8.91  | 1.28  |
|          |                | TPR        | 71.97  | 76.04 | 52.50 | 80.92 | 74.74 | 62.38 | 42.22        | 70.41 | 74.85 | 64.36 | 83.33 | 85.06 | 74.67 | 60.77 |
|          |                | ACC        | 86.69  | 86.54 | 89.14 | 91.51 | 85.09 | 82.32 | 77.74        | 91.25 | 86.92 | 81.80 | 98.63 | 91.70 | 83.25 | 83.03 |
|          | DAW-FDD (Ours) | AUC        | 93.30  | 96.24 | 88.66 | 98.23 | 93.64 | 93.69 | 77.89        | 96.73 | 93.24 | 91.43 | 100   | 98.97 | 93.87 | 97.72 |
|          |                | FPR        | 5.06   | 3.34  | 4.88  | 1.95  | 5.43  | 4.31  | 11.35        | 3.04  | 4.99  | 6.27  | 0.16  | 0.91  | 5.97  | 0.85  |
|          |                | TPR        | 74.11  | 75.77 | 54.17 | 82.59 | 74.74 | 65.15 | 40.00        | 74.56 | 76.92 | 65.35 | 96.67 | 85.76 | 73.14 | 64.99 |
|          |                | ACC        | 88.84  | 87.93 | 91.05 | 93.36 | 86.36 | 86.04 | 80.66        | 92.45 | 88.65 | 86.77 | 99.70 | 94.03 | 84.06 | 85.03 |

Table E.7. Detailed test set results of each group in Xception on the FF++, Celeb-DF, DFD and DFDC datasets. '-' means not applicable.

| Models          | Methods        | Metric (%) | Gender |       | Race  |       |       |       | Intersection |       |       |       |       |       |       |       |
|-----------------|----------------|------------|--------|-------|-------|-------|-------|-------|--------------|-------|-------|-------|-------|-------|-------|-------|
|                 |                |            | M      | F     | A     | B     | W     | O     | M-A          | M-B   | M-W   | M-O   | F-A   | F-B   | F-W   | F-O   |
| ResNet-50       | Original       | AUC        | 93.54  | 95.15 | 92.19 | 96.38 | 94.51 | 96.10 | 87.06        | 97.67 | 94.22 | 94.04 | 94.75 | 96.16 | 94.92 | 98.23 |
|                 |                | FPR        | 24.57  | 27.15 | 33.28 | 27.62 | 24.97 | 20.48 | 35.29        | 20.65 | 23.16 | 24.86 | 32.13 | 33.05 | 26.61 | 15.23 |
|                 |                | TPR        | 94.24  | 98.30 | 96.89 | 97.68 | 96.17 | 96.49 | 93.65        | 96.67 | 94.17 | 94.04 | 98.59 | 98.75 | 98.06 | 100   |
|                 |                | ACC        | 90.96  | 93.65 | 91.01 | 93.25 | 92.42 | 93.69 | 87.75        | 94.02 | 91.15 | 91.12 | 92.76 | 92.48 | 93.60 | 97.27 |
|                 | DAG-FDD (Ours) | AUC        | 93.50  | 95.56 | 92.40 | 95.21 | 94.69 | 96.58 | 89.36        | 97.17 | 93.78 | 94.82 | 93.92 | 94.82 | 95.70 | 98.82 |
|                 |                | FPR        | 21.33  | 23.54 | 27.76 | 26.67 | 21.32 | 21.69 | 27.31        | 17.39 | 20.20 | 25.41 | 28.02 | 33.90 | 22.34 | 17.22 |
|                 |                | TPR        | 93.16  | 97.32 | 96.48 | 95.96 | 95.03 | 96.01 | 93.86        | 95.88 | 92.83 | 93.64 | 97.85 | 96.04 | 97.10 | 99.42 |
|                 |                | ACC        | 90.64  | 93.51 | 91.76 | 92.00 | 92.12 | 93.09 | 89.55        | 93.85 | 90.56 | 90.69 | 92.94 | 90.13 | 93.59 | 96.43 |
|                 | DAW-FDD (Ours) | AUC        | 92.78  | 94.78 | 91.78 | 95.79 | 93.84 | 95.50 | 88.59        | 96.75 | 93.17 | 93.23 | 93.29 | 95.93 | 94.80 | 97.81 |
|                 |                | FPR        | 21.52  | 25.31 | 29.29 | 23.81 | 22.55 | 22.29 | 29.83        | 19.57 | 19.76 | 27.07 | 28.99 | 27.12 | 25.07 | 16.56 |
|                 |                | TPR        | 90.29  | 96.72 | 94.66 | 95.66 | 93.20 | 95.00 | 90.74        | 94.90 | 89.75 | 91.62 | 96.72 | 96.46 | 96.46 | 99.86 |
|                 |                | ACC        | 88.23  | 92.69 | 90.00 | 92.25 | 90.40 | 92.15 | 86.55        | 92.69 | 88.09 | 88.73 | 91.84 | 91.81 | 92.57 | 96.91 |
| EfficientNet-B3 | Original       | AUC        | 94.72  | 97.07 | 94.56 | 98.80 | 95.96 | 96.85 | 90.78        | 98.64 | 94.87 | 96.37 | 96.59 | 99.00 | 97.03 | 98.29 |
|                 |                | FPR        | 19.19  | 21.17 | 25.61 | 19.05 | 19.65 | 16.57 | 24.79        | 18.48 | 19.13 | 12.71 | 26.09 | 19.49 | 20.11 | 21.19 |
|                 |                | TPR        | 96.07  | 98.25 | 97.33 | 99.19 | 97.19 | 96.07 | 93.00        | 99.02 | 96.56 | 93.74 | 99.60 | 99.38 | 97.78 | 99.42 |
|                 |                | ACC        | 93.42  | 94.70 | 92.86 | 96.00 | 94.20 | 93.99 | 89.37        | 96.35 | 93.83 | 92.74 | 94.73 | 95.65 | 94.55 | 95.72 |
|                 | DAG-FDD (Ours) | AUC        | 97.01  | 97.46 | 96.06 | 99.45 | 97.27 | 97.73 | 94.67        | 99.74 | 97.08 | 97.26 | 96.68 | 99.19 | 97.51 | 98.81 |
|                 |                | FPR        | 8.14   | 8.61  | 10.43 | 0.95  | 8.46  | 8.43  | 9.66         | 0.00  | 8.37  | 8.29  | 10.87 | 1.70  | 8.55  | 8.61  |
|                 |                | TPR        | 90.32  | 95.20 | 93.77 | 94.34 | 92.50 | 94.05 | 86.55        | 94.71 | 90.48 | 90.40 | 97.57 | 93.96 | 94.40 | 99.28 |
|                 |                | ACC        | 90.59  | 94.51 | 92.95 | 95.17 | 92.33 | 93.64 | 87.32        | 95.52 | 90.68 | 90.61 | 95.97 | 94.82 | 93.87 | 97.86 |
|                 | DAW-FDD (Ours) | AUC        | 95.96  | 96.68 | 95.80 | 98.09 | 96.22 | 97.79 | 95.09        | 97.45 | 95.83 | 97.20 | 95.92 | 98.69 | 96.68 | 98.88 |
|                 |                | FPR        | 8.24   | 8.20  | 9.51  | 9.05  | 8.16  | 5.72  | 8.82         | 11.96 | 8.24  | 5.53  | 9.90  | 6.78  | 8.09  | 5.96  |
|                 |                | TPR        | 88.55  | 94.05 | 93.36 | 95.15 | 90.68 | 92.98 | 86.44        | 93.73 | 88.34 | 89.50 | 97.00 | 96.67 | 92.90 | 97.97 |
|                 |                | ACC        | 89.11  | 93.64 | 92.80 | 94.42 | 90.89 | 93.19 | 87.40        | 92.86 | 88.93 | 90.27 | 95.69 | 95.99 | 92.72 | 97.27 |
| DSP-FWA         | Original       | AUC        | 89.75  | 93.97 | 90.13 | 95.60 | 91.72 | 94.16 | 83.99        | 96.38 | 90.10 | 90.63 | 93.32 | 96.51 | 93.62 | 98.77 |
|                 |                | FPR        | 28.48  | 34.37 | 40.64 | 31.43 | 29.58 | 34.94 | 38.24        | 20.65 | 26.50 | 37.02 | 42.03 | 39.83 | 32.37 | 32.45 |
|                 |                | TPR        | 90.08  | 95.99 | 95.33 | 96.77 | 92.46 | 94.11 | 91.82        | 95.29 | 89.48 | 90.30 | 97.17 | 98.33 | 95.28 | 99.57 |
|                 |                | ACC        | 86.85  | 90.45 | 88.33 | 91.83 | 88.55 | 89.31 | 85.69        | 92.86 | 86.70 | 86.08 | 89.73 | 90.80 | 90.29 | 93.82 |
|                 | DAG-FDD (Ours) | AUC        | 90.19  | 92.78 | 89.50 | 95.43 | 91.79 | 91.83 | 84.10        | 95.13 | 90.78 | 91.04 | 92.08 | 96.06 | 92.90 | 93.54 |
|                 |                | FPR        | 29.86  | 34.50 | 42.64 | 37.14 | 30.11 | 31.63 | 42.86        | 41.30 | 27.25 | 29.83 | 42.51 | 33.90 | 32.71 | 33.78 |
|                 |                | TPR        | 91.02  | 96.15 | 94.96 | 98.59 | 93.14 | 93.99 | 88.38        | 98.63 | 90.98 | 89.90 | 98.42 | 98.54 | 95.18 | 99.86 |
|                 |                | ACC        | 87.39  | 90.55 | 87.64 | 92.33 | 89.01 | 89.76 | 82.01        | 92.53 | 87.80 | 86.85 | 90.65 | 92.14 | 90.15 | 93.82 |
|                 | DAW-FDD (Ours) | AUC        | 88.15  | 93.54 | 90.54 | 94.44 | 90.63 | 92.05 | 85.08        | 95.23 | 87.81 | 91.13 | 94.30 | 93.86 | 93.49 | 94.07 |
|                 |                | FPR        | 28.81  | 31.83 | 34.20 | 31.43 | 29.19 | 34.94 | 26.05        | 38.04 | 27.88 | 35.91 | 38.89 | 26.27 | 30.37 | 33.78 |
|                 |                | TPR        | 87.64  | 95.92 | 92.73 | 96.06 | 91.22 | 95.18 | 82.35        | 95.88 | 87.10 | 92.42 | 98.19 | 96.25 | 95.12 | 99.13 |
|                 |                | ACC        | 84.77  | 90.85 | 87.49 | 91.25 | 87.60 | 90.21 | 80.63        | 90.70 | 84.49 | 88.04 | 91.16 | 91.81 | 90.52 | 93.22 |
| RECCE           | Original       | AUC        | 97.15  | 98.86 | 97.44 | 98.65 | 98.12 | 98.51 | 94.75        | 99.20 | 97.31 | 97.76 | 98.71 | 98.40 | 98.89 | 99.71 |
|                 |                | FPR        | 21.67  | 20.80 | 32.67 | 28.10 | 19.26 | 13.86 | 39.50        | 41.30 | 19.07 | 11.05 | 28.74 | 17.80 | 19.43 | 17.22 |
|                 |                | TPR        | 97.03  | 99.29 | 98.04 | 100   | 98.17 | 97.80 | 95.37        | 100   | 97.10 | 96.47 | 99.43 | 100   | 99.18 | 99.71 |
|                 |                | ACC        | 93.77  | 95.62 | 92.06 | 95.08 | 95.08 | 95.88 | 88.26        | 93.69 | 94.29 | 95.30 | 94.09 | 96.49 | 95.82 | 96.67 |
|                 | DAG-FDD (Ours) | AUC        | 97.71  | 98.90 | 97.13 | 99.65 | 98.40 | 99.04 | 94.02        | 99.69 | 97.97 | 98.09 | 98.56 | 99.62 | 98.85 | 99.88 |
|                 |                | FPR        | 11.71  | 12.26 | 18.87 | 6.19  | 11.45 | 7.83  | 19.75        | 4.35  | 11.08 | 10.50 | 18.36 | 7.63  | 11.80 | 4.64  |
|                 |                | TPR        | 95.15  | 98.31 | 96.55 | 98.79 | 96.79 | 96.13 | 92.47        | 99.22 | 95.35 | 94.04 | 98.70 | 98.33 | 98.16 | 99.13 |
|                 |                | ACC        | 93.95  | 96.38 | 93.55 | 97.92 | 95.33 | 95.48 | 89.97        | 98.67 | 94.23 | 93.34 | 95.46 | 97.16 | 96.36 | 98.45 |
|                 | DAW-FDD (Ours) | AUC        | 97.73  | 98.98 | 98.17 | 98.85 | 98.27 | 99.00 | 95.52        | 98.24 | 97.94 | 98.31 | 99.54 | 99.49 | 98.70 | 99.89 |
|                 |                | FPR        | 8.29   | 8.04  | 7.67  | 10.00 | 8.64  | 3.01  | 7.56         | 16.30 | 8.56  | 2.76  | 7.73  | 5.09  | 8.72  | 3.31  |
|                 |                | TPR        | 92.24  | 96.74 | 93.70 | 97.37 | 94.60 | 94.29 | 85.79        | 98.24 | 92.81 | 90.81 | 97.85 | 96.46 | 96.29 | 99.28 |
|                 |                | ACC        | 92.15  | 95.86 | 93.43 | 96.08 | 94.02 | 94.73 | 87.15        | 96.01 | 92.57 | 91.80 | 96.79 | 96.15 | 95.38 | 98.81 |

Table E.8. Detailed test set results of each group in ResNet-50, EfficientNet-B3, DSP-FWA, and RECCE on the FF++ dataset.
